# Supplementary material
Source: Springer Nature journal article supplement (https://www.springermedizin.de/resource/supplementary/12874_2011_822_MOESM7_ESM.pdf/9432696)

## ER Visits and Mental Health Odds Ratios

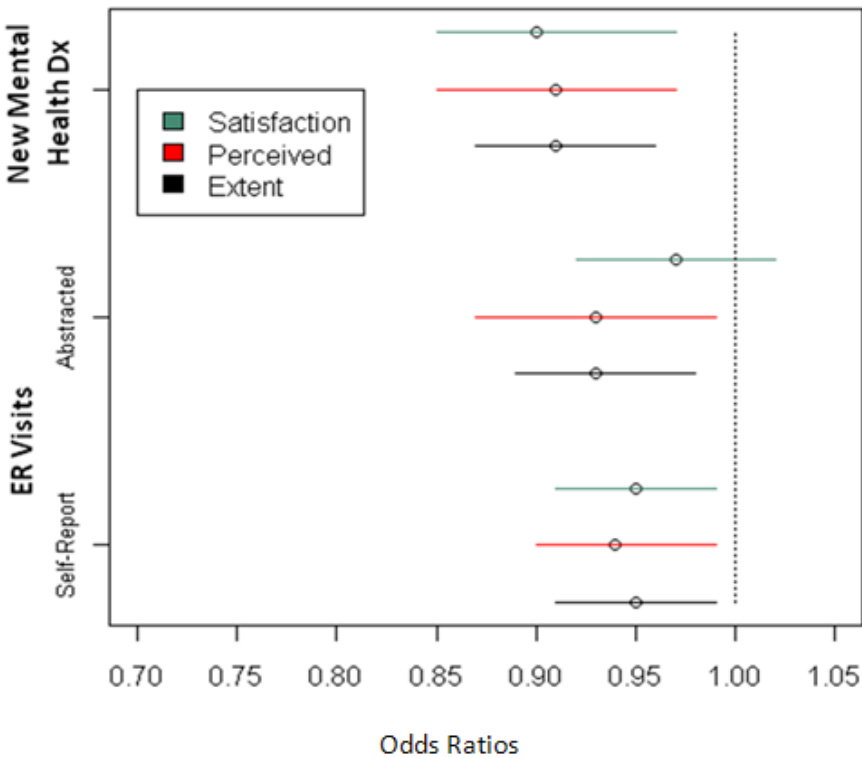

Supplement: MOESM7 [file 9432696]
